# Supplementary material
Source: PubMed Central journal article supplement (PMC6939345)
Supplement: rstb20190305supp1.pdf [file rstb20190305supp1.pdf]

Supplemental Material For:

*Phase synchronization varies systematically with linguistic structure composition*

Jonathan R. Brennan<sup>1</sup> [orcid: 0000-0002-3639-350X]

Andrea E. Martin<sup>2\*</sup> [orcid: 0000-0002-3395-7234]

<sup>1</sup>Department of Linguistics, University of Michigan

<sup>2</sup>Max Planck Institute for Psycholinguistics

28 August 2019

\*corresponding author, contact details:

Andrea E. Martin

Max Planck Institute for Psycholinguistics

Wundtlaan 1

6525 XD Nijmegen

The Netherlands

andrea.martin@mpi.nl

+31(0)243 521 585

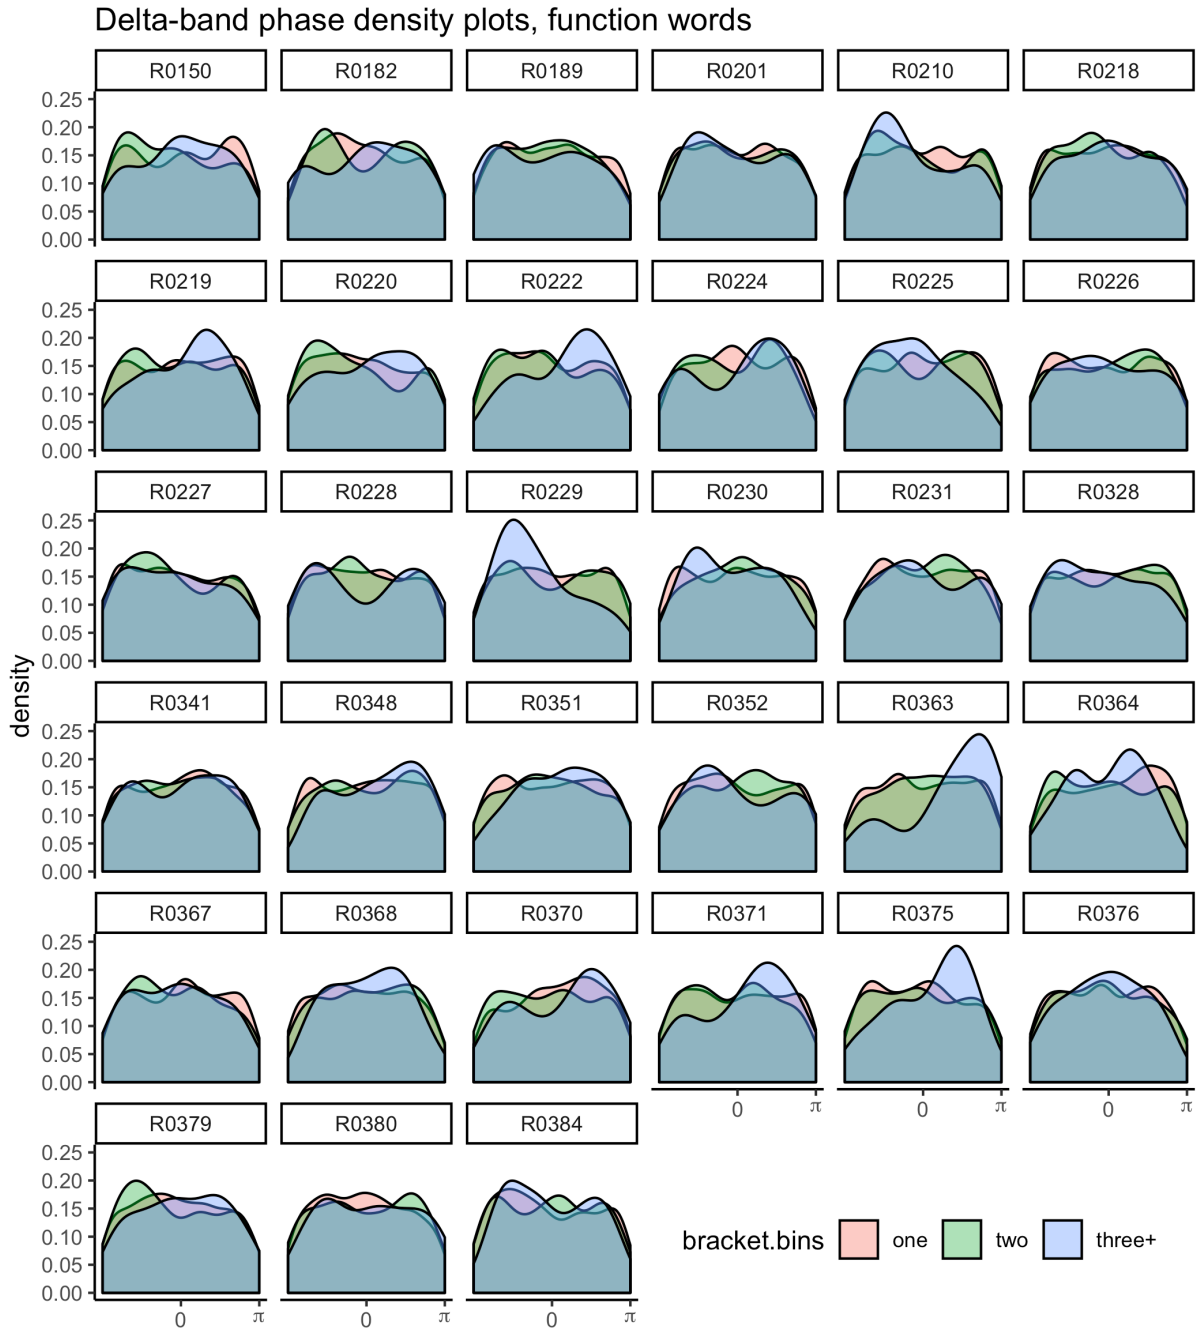

**Figure S1:** Density plots of delta-band phase for function words in individual participants. Numerous participants show increasingly unimodal distributions for three+ brackets (blue), but the peak phase differs across participants.

### A. Content Words

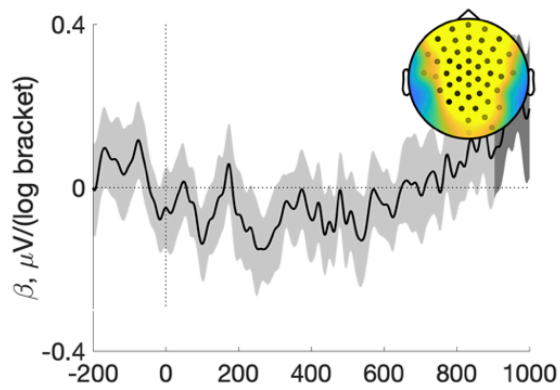

### B. Function Words

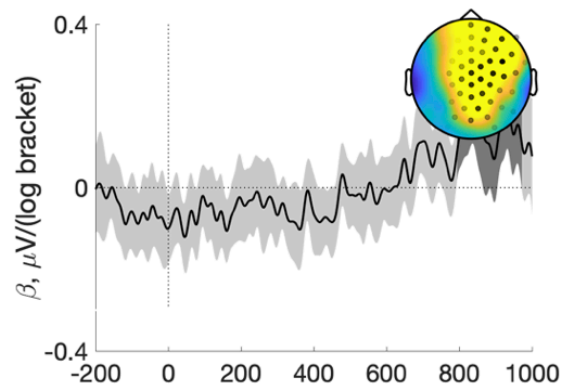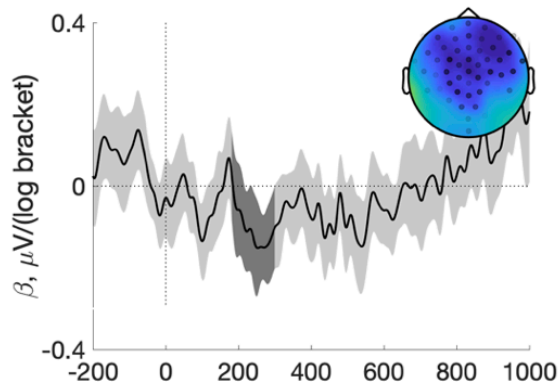

**Figure S2:** Regression Event-Related Potential (rERP) plots of spatio-temporal clusters that show a reliable log-scale effect of brackets on evoked EEG data from (A) content-words or (B) function words. In all panels, black traces and grey shading indicate the grand-averaged regression coefficient ( $\pm CI_{95\%}$ ) from electrodes contributing to that effect; insets show those electrodes along with a topographic plot of activity averaged across the cluster's time-window (dark-grey shading). The top plots for both content and function words show a reliable cluster of positive-going activity over central posterior-electrodes starting about 700-800 ms after word onset,  $p = 0.012$ ;  $p = 0.048$ , respectively; the bottom plot shows a reliable negative-going cluster over anterior electrodes starting around 200 ms only for content-words,  $p < 0.001$ .
